# Supplementary material for: The interaction of ω2 with the RNA polymerase β’ subunit functions as an activation to repression switch
Source: PubMed Central journal article supplement — Nucleic Acids Res. 2015 Aug 3;43(19):9249–61. doi: 10.1093/nar/gkv788 (PMC4627068; doi:10.1093/nar/gkv788), 2015-08-03

## The interaction of $\omega_2$ with the RNA polymerase $\beta'$ subunit functions as an activation to repression switch

Andrea Volante, Begoña Carrasco, Mariangela Tabone and Juan C. Alonso\*  
Departamento de Biotecnología Microbiana, Centro Nacional de Biotecnología, CNB-CSIC,  
3, Darwin Street, 28049 Madrid, Spain.

*Annex 1.*

### Partial $P_{\omega}$ occupancy by $\omega_2$ activates transcription

Protein  $\omega_2$  has a high affinity for operators that contain at least two consecutive heptads. This affinity increases when four or more heptads are involved ( $K_{Dapp} 5 \pm 1$ ) (1). However, with a single heptad or with heptads separated by one or more base pairs, binding is extremely poor ( $K_{Dapp} > 800$  nM) (1). The affinity also depends on heptad organization and is maximal for converging ( $\rightarrow\leftarrow$ ,  $K_{Dapp} \sim 20$  nM), while lower for direct ( $\rightarrow\rightarrow$ ,  $K_{Dapp} \sim 40$  nM) and diverging ( $\leftarrow\leftarrow$ ,  $K_{Dapp} 120$  nM) heptad arrangements (1). The  $\omega_2$  protein does not distort the DNA structure upon binding to  $\rightarrow\rightarrow$  or  $\rightarrow\leftarrow$  DNA (2). These structures show that a pair of positively charged, antiparallel  $\beta$  strands of  $\omega_2$  insert into the major groove of DNA and establish sequence-dependent contacts to symmetric or asymmetric repetitive sequences with a 0.3 Å deviation with respect to the central C-G pair of each repetition (2-5). The interaction between RNAP- $\sigma^A$  and  $P_{\omega}$  DNA was enhanced with sub-stoichiometric concentrations of  $\omega_2$  (Fig. 2). We hypothesised that, under these conditions,  $\omega_2$  would preferentially bind to heptads with a  $\rightarrow\leftarrow$  configuration (e.g, heptads 6 and 7) (Fig. S1 and 3A). These heptads overlapped the -35 element and the spacer region (positions -34 to -21). To test this hypothesis, the heptad 6 ( $\leftarrow$ , 5'-TGTGAgT-3'), 7 ( $\leftarrow$ , 5'-TaatacTT-3'), or heptads 6 plus 7 ( $\leftarrow\leftarrow$ , 5'-TGTGAgTTaatacTT-3') were mutagenized. Run-off transcription experiments were then performed with each. As a control, equivalent mutations were introduced in heptad 1 ( $\rightarrow$ ), 2 ( $\rightarrow$ ) or heptads 1 plus 2 ( $\rightarrow\rightarrow$ ) (Fig. S1 and 3A). With the exception of mutated sequences of heptads 6 plus 7 (which included mutations within the -35 element), RNAP- $\sigma^A$  transcribed the  $P_{\omega}$  variants nearly as well as the wt in the absence of  $\omega_2$  (data not shown). Similar levels of transcription were observed in the presence of limiting or stoichiometric amounts of  $\omega_2$ . This result suggests that the selective occupancy of heptads 6 and 7 play a minor role, if any, in  $\omega_2$  regulation of  $P_{\omega}$  utilization.

*Annex 2.*

### **Proteins $\omega_2$ or $\omega_{2_2}$ repress $P_\delta$ utilization**

The  $\omega_2$  protein has three functional regions: i) the unstructured NTD (residues 1-19) required for the  $\omega_2 \cdot \delta_2$  interaction (4); ii) the  $\beta$ -sheet domain (residues 28-32), which is necessary for DNA binding (2,3,5); and iii) the  $\alpha$ -helix  $\alpha_1$  (residues 34-46) which in concert with the  $\alpha$ -helix  $\alpha_2$  domain (residues 51-64) contribute to monomer-monomer and dimer-dimer interfaces (2,3). Whether or not residues 10-28 and the C-terminal residues 65-71 have anything more than a structural role to play is unknown (3,6).

Members of the superfamily of  $\omega_2$  regulators can be divided into two sub-families, of which  $\omega$  and  $\omega_2$  are representative (7,8). Monomeric  $\omega_2$  (79-residues long) shares 98% identity with  $\omega$  (71-amino acids) within the first 55 residues, but the degree of identity drops to 18% in the remaining 24 residues (Fig. S7A). With the aim of mapping the  $\omega_2$  domain involved in the interaction with RNAP- $\sigma^A$ , and to test whether a similar mechanism of action applies to other  $\omega_2$  regulated promoters, we compared  $P_\delta$  promoter binding and consequent transcription repression activity, *in vivo*, of  $\omega_{2_2}$ ,  $\omega_2$  or  $\omega_2\Delta N19$ , which lacks the 19 first amino acids (4). A single copy of  $P_\delta$  was fused to the promoter-less *lacZ* gene and integrated into the *amyE* locus of the *B. subtilis* genome as a unique copy. This operation was performed in the BG508 strain (9). This construct was used to measure the effect of these  $\omega$ -like genes *in trans*. The results of  $\beta$ -galactosidase activity assays showed that  $\omega_2$  repressed  $P_\delta$  mediated transcription to levels comparable to those of  $\omega_2$  or  $\omega_2\Delta N19$  (Fig. S7B) (2,4,9). This suggested that the dimer is the functional form of  $\omega_2$  and that the different C-terminal domains of  $\omega$  and  $\omega_2$  are not involved in gene repression. *In vivo* experiments also revealed an increase in the repression of  $P_\delta$  utilization in the presence of both  $\omega_2$  and  $\delta_2$  (Fig. 7B), suggesting that these proteins act in concert.

### *Annex 3.*

#### **The central and C-terminal regions of $\omega_2$ might not interact with RNAP- $\sigma^A$**

The strain bearing the  $P_\delta:lacZ$  fusion (see Annex 2) was transformed with a plasmid carrying a  $\omega$  sequence that had a mutation either in its coiled ( $\omega K52A$ ),  $\alpha$ -helix  $\alpha_2$  ( $\omega E53A$ ), or hypothetical  $\alpha$ -helix  $\alpha_2'$  ( $\omega R70A$ ) regions. The effect of these mutants on  $P_\delta$  expression was comparable to that of wt  $\omega_2$  *in trans*. All of them repressed  $P_\delta$  transcription by >50-fold (Fig. S7B). An intermediate effect was observed with the  $\omega R64A$  mutant, which repressed  $P_\delta$  utilization by ~30-fold (Fig. S7B). However, the D56A mutant only reduced  $P_\delta$  transcription

~6-fold. Since the intracellular concentrations of  $\omega_2$  and its mutant variants were similar (data not shown), we tentatively proposed that  $\omega_2$ D56A was impaired in its interaction with either  $P_{\omega}$  DNA, with itself or with RNAP- $\sigma^A$ . To test these hypotheses, the  $\omega$ D56A gene was over-expressed and its product was purified and characterized *in vitro*.

In comparison with the wt, the  $\omega$ D56A protein binds  $P_{\omega}$  DNA weakly (data not shown). Also, smaller proportion of this mutant protein assembles into dimers (Fig. S7C). In light of the fact that, in the dimeric form of  $\omega$ , the  $\beta$ -sheet adopts an antiparallel orientation before binding  $P_{\omega}$  DNA, we propose that the main consequence of D56A mutation is poor  $\omega$  dimerization. This is consistent with the observation that  $\omega$ D56A binds  $P_{\omega}$  DNA with reduced affinity and suggests that D56 contributes to the  $\omega$ - $\omega$  interface (Fig. S7D). Therefore,  $\omega$ D56A was not analysed further. It would be very interesting to determine whether the  $\omega_2$  NTD can by itself recruit RNAP- $\sigma^A$  to the  $\omega_2$ · $P_{\omega}$  DNA complex.

## References

1. de la Hoz, A.B., Pratto, F., Misselwitz, R., Speck, C., Weihofen, W., Welfle, K., Saenger, W., Welfle, H. and Alonso, J.C. (2004) Recognition of DNA by  $\omega$  protein from the broad-host range *Streptococcus pyogenes* plasmid pSM19035: analysis of binding to operator DNA with one to four heptad repeats. *Nucl Acids Res*, **32**, 3136-3147.
2. Weihofen, W.A., Cicek, A., Pratto, F., Alonso, J.C. and Saenger, W. (2006) Structures of  $\omega$  repressors bound to direct and inverted DNA repeats explain modulation of transcription. *Nucl Acids Res*, **34**, 1450-1458.
3. Murayama, K., Orth, P., de la Hoz, A.B., Alonso, J.C. and Saenger, W. (2001) Crystal structure of  $\omega$  transcriptional repressor encoded by *Streptococcus pyogenes* plasmid pSM19035 at 1.5Å resolution. *J Mol Biol*, **314**, 789-796.
4. Welfle, K., Pratto, F., Misselwitz, R., Behlke, J., Alonso, J.C. and Welfle, H. (2005) Role of the N-terminal region and of  $\beta$ -sheet residue Thr29 on the activity of the  $\omega_2$  global regulator from the broad-host range *Streptococcus pyogenes* plasmid pSM19035. *Biol Chem*, **386**, 881-894.
5. Dostál, L., Pratto, F., Alonso, J.C. and Welfle, H. (2007) Binding of regulatory protein  $\omega$  from *Streptococcus pyogenes* plasmid pSM19035 to direct and inverted 7-Base pair repeats of operator DNA. *J. Raman Spectrosc*, **38**, 166-175.
6. Murayama, K., de la Hoz, A.B., Alings, C., Lopez, G., Orth, P., Alonso, J.C. and Saenger, W. (1999) Crystallization and preliminary X-ray diffraction studies of *Streptococcus pyogenes* plasmid pSM19035-encoded  $\omega$  transcriptional repressor. *Acta Crystallogr D Biol Crystallogr*, **55 ( Pt 12)**, 2041-2042.
7. Liroy, V.S., Pratto, F., de la Hoz, A.B., Ayora, S. and Alonso, J.C. (2010) Plasmid pSM19035, a model to study stable maintenance in Firmicutes. *Plasmid*, **64**, 1-17.
8. Croucher, N.J., Harris, S.R., Fraser, C., Quail, M.A., Burton, J., van der Linden, M., McGee, L., von Gottberg, A., Song, J.H., Ko, K.S. *et al.* (2011) Rapid pneumococcal evolution in response to clinical interventions. *Science*, **331**, 430-434.

9. de la Hoz, A.B., Ayora, S., Sitkiewicz, I., Fernandez, S., Pankiewicz, R., Alonso, J.C. and Ceglowski, P. (2000) Plasmid copy-number control and better-than-random segregation genes of pSM19035 share a common regulator. *Proc Natl Acad Sci U S A*, **97**, 728-733.
10. Miller, J.H. (1972) *Experiments in Molecular Genetics* Cold Spring Harbor Lab. Press, Plainview, NY.

## Figure legends

**Fig. S1.** Protein  $\omega_2$  or  $\omega_{22}$  cognate sites. Illustration of the  $P_\omega$ ,  $P_{\omega_2}$ ,  $P_\delta$ , and  $P_{copS/R/F}$  regions from plasmids pIP501<sup>a</sup>, pSM19035<sup>b</sup>, pAM $\beta$ 1<sup>c</sup>, pRE25<sup>d</sup>, and pVEF23<sup>e</sup>. The positions of nucleotides are numbered relative to the transcription start site. Contiguous 7-bp repeats and their relative orientations are represented with either  $\rightarrow$  or  $\leftarrow$ . The -35 and -10 elements are indicated with rectangles and the transcription start sites indicated with solid arrows bent 90°. The dotted-line rectangles and the empty, bent arrows marked with a “?” denote uncharacterized promoters.

**Fig. S2.** The  $\omega_2$  protein modulates RNAP- $\sigma^A$  binding to  $P_\omega$  DNA. The 423-bp [ $\alpha^{32}$ P]- $P_\omega$  DNA (1 nM) was incubated with a range of concentrations of  $\omega_2$  (7.5, 15 and 30 nM in [A] or 7.5, 15, 30 to 60 in [B]) or concentrations of RNAP- $\sigma^A$  (3.7, 7.5, 15 and 30 nM in A and B). Alternatively, the amount of  $\omega_2$  was fixed either at 3.7 nM in (A, lanes 10-13), 7.5 nM (B, lanes 12-16) or 60 nM (B, lanes 17-21) while the concentration of RNAP- $\sigma^A$  was varied (3.7, 7.5, 15 and 30 nM). After DNase I treatment, the complexes were analysed by dPAGE. The +1 site is labelled in the diagram of the operator site-promoter  $P_\omega$  region. The dotted-line rectangle in (A) highlight the extended footprint of RNAP- $\sigma^A$  in lanes 8-10.

**Fig. S3.** Cooperative binding of  $\omega_2$ ,  $\delta_2$  and RNAP- $\sigma^A$  to  $P_\omega$  DNA. Linear 423-bp [ $\alpha^{32}$ P]-*HindIII-KpnI*  $P_\omega$  DNA (0.2 nM) was incubated with either 0.75 or 6 nM of  $\omega_2$ , either 7.5 or 30 nM of RNAP- $\sigma^A$ , or 37, 75, or 150 nM of  $\delta_2$ . Alternatively, the concentration of  $\omega_2$  was fixed at 0.75 nM, while a range of concentrations of  $\delta$  was used (37, 75 and 150 nM). Also tested was a fixed concentration of both  $\omega_2$  (0.75 nM) and RNAP- $\sigma^A$  (7.5 nM) in the presence of a varied amount of  $\delta_2$  (37, 75 and 150 nM). These reactions were performed for 15 min at 37 °C in buffer C in the presence (A) or absence (B) of 1 mM ATP. (C)  $P_\omega$  DNA was incubated with increasing amounts of  $\omega_2$  (0.75, 1.5, 3, 6, 12 and 24 nM, solid circles) or  $\delta_2$ -ATP (18.5, 37, 75, 150, 300 and 600 nM, solid squares). Alternatively,  $\omega_2$  was fixed (0.75 nM) and increasing amounts of  $\delta_2$ -ATP (9.2, 18.5, 37, 75, 150 and 300 nM, empty squares) used, or apo- $\delta_2$  was fixed (37 nM) and increasing concentrations of  $\omega_2$  (0.19, 0.37, 0.75, 1.5, 3 and 6 nM, empty circles) used. The signals present in the protein-DNA complex and in the free-DNA (FD) was determined by densitometry. The data presented here are averages and standard deviations of the results of at least three independent experiments. (D) Binding of  $\delta_2$  and RNAP- $\sigma^A$  to  $P_\omega$  DNA. A 423-bp [ $\alpha^{32}$ P]  $P_\omega$  DNA was incubated with increasing amounts

of  $\delta_2$  (37, 75 and 150 nM) or RNAP- $\sigma^A$  (15, 30 and 60 nM), or a fixed concentration of RNAP- $\sigma^A$  (15, 30 or 60 nM) and increasing concentrations of  $\delta_2$  (37, 75, 150, 3 nM) in buffer A containing 1 mM ATP for 15 min at 37° C. The signals present in the protein-DNA complex and in the FD was determined by densitometry.

**Fig. S4.** Effect of  $\omega_2$  on the formation of a RNAP- $\sigma^A$ -promoter  $RP_O$  complex with  $P_\omega$  DNA. (A) 423-bp [ $\alpha^{32}P$ ]-*HindIII-KpnI*  $P_\omega$  DNA (1 nM) was pre-incubated with increasing concentrations of  $\omega_2$  (1.8, 3.5, 7.5, 15, 30 and 60 nM, solid circles). Then, a fixed amount of RNAP- $\sigma^A$  (7.5 nM) in the absence (lanes 1-8) or presence (lanes 9-16) of the initiating nucleotides GTP and ATP was added. DNA melting was probed by  $KMnO_4$  footprinting. The positions hypersensitive to  $KMnO_4$  are marked ( $RP_O$  and  $RP_{INIT}$ ) and depicted at the bottom; the coordinates are indicated relative to the transcription start point. Purine (G +A) chemical sequencing reactions are shown. Also depicted are the relevant regions. (B) Plot of the relative intensity of the bands of the  $RP_O$  and  $RP_{INIT}$  hypersensitive sites. Band intensities were determined by densitometry. The data presented here are averages and standard deviations of the results of at least three independent experiments.

**Fig. S5.** RNAP- $\sigma^A$ -promoter  $RP_O$  at  $P_\omega$  is not affected by  $\delta_2$ . 423-bp *HindIII-KpnI*  $P_\omega$  DNA (1 nM) was incubated with a fixed amount of RNAP- $\sigma^A$  (7.5 nM) in the absence (lane 5) or presence of increasing concentrations of  $\delta_2$  (75, 150, 300 and 600 nM) in the presence of the initiating nucleotides (GTP and ATP) and DNA melting (open complex) was probed by  $KMnO_4$  footprinting. The positions hypersensitive to  $KMnO_4$  are marked ( $RP_O$  and  $RP_{INIT}$ ); the coordinates are indicated relative to the transcription start point. The data presented are representative of at least three independent experiments. Purine (G +A), chemical sequencing reactions are shown. The relevant regions of  $P_\omega$  are depicted.

**Fig. S6.** RNAP- $\sigma^A$  retains  $\omega_2$ . A mixture containing 1.5  $\mu$ g His-tagged RNAP- $\sigma^A$  and of  $\omega_2$  in buffer A was loaded onto a 50  $\mu$ l  $Ni^{2+}$  micro-column at room temperature. After extensive washing, the retained proteins were eluted with 50  $\mu$ l buffer B containing 1 M NaCl and 0.4 M imidazole. These were resolved by SDS-PAGE and stained with Coomassie blue. The data presented are representative of at least three independent experiments.

**Fig. S7.** Protein  $\omega_2$  recognizes and represses  $P_{\delta}$  utilization. **(A)** Clustal W2 sequence alignment of the transcriptional repressors  $\omega$  and  $\omega_2$  with secondary structure elements shown above. The identical and conserved amino acids denoted in red and in blue, respectively. **(B)** Activity specified by  $P_{\delta}$  in the presence or absence of the indicated product. The  $\beta$ -galactosidase activity is expressed in Miller units (10). Values presented are the means of data from at least four separate experiments. **(C)** Either wt  $\omega_2$  or the  $\omega_2$ D56A variant was incubated with increasing concentrations of the DSS cross-linking agents. The proteins were resolved by 12.5% SDS-PAGE and the proportion of protein found in dimers was calculated. **(D)** Structural model of  $\omega_2$ -bound to  $P_{\omega}$  DNA. This is derived from the 3D co-structure of the minimal operator site and  $\omega_2\Delta 19$  (1IRQ PDB) (2). The position of D56 is highlight in red.

**Fig. S8.** A model of  $\omega_2$  and RNAP- $\sigma^A$  in a complex with  $P_{\omega}$  DNA. Shown is the spatial occupancy model of three  $\omega_2$  bound to  $P_{\omega}$  in the presence or absence of  $\beta'$  alone or RNAP- $\sigma^A$ . The modelled structures were prepared with I-Tasser and visualized with PyMOL version 1.5.0.4. The structures of the RNAP subunits of *B. subtilis* are represented using the following colour scheme: the  $\sigma$  factor (green),  $\alpha^I$  and  $\alpha^{II}$  (orange and light orange),  $\beta$  (blue) and the  $\beta'$  subunit (red). The DNA is indicated in orange and the  $-35$  and  $-10$  sites in yellow. Protein  $\omega_2$  is represented in pink and grey.

Fig. S1

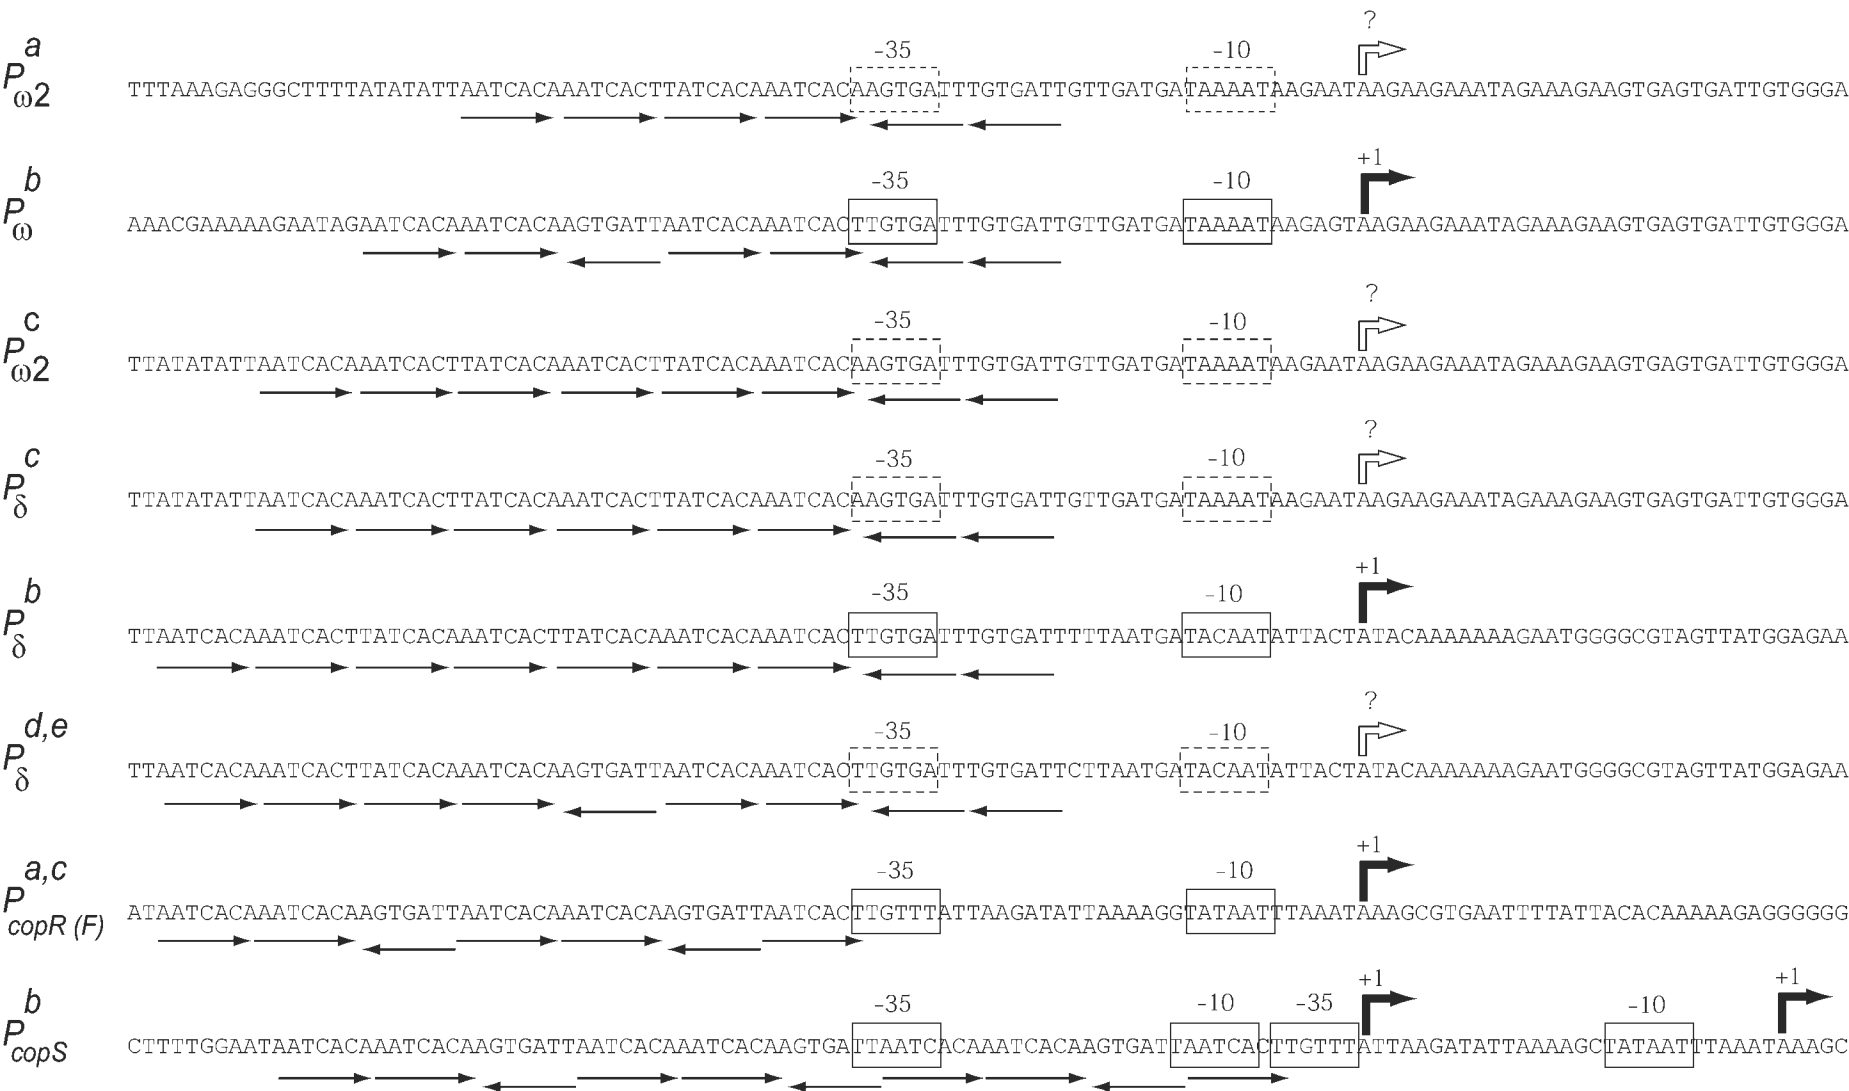



Fig. S2

**A**

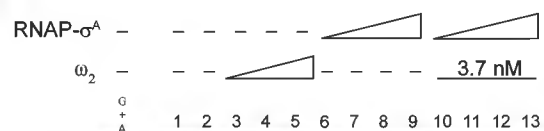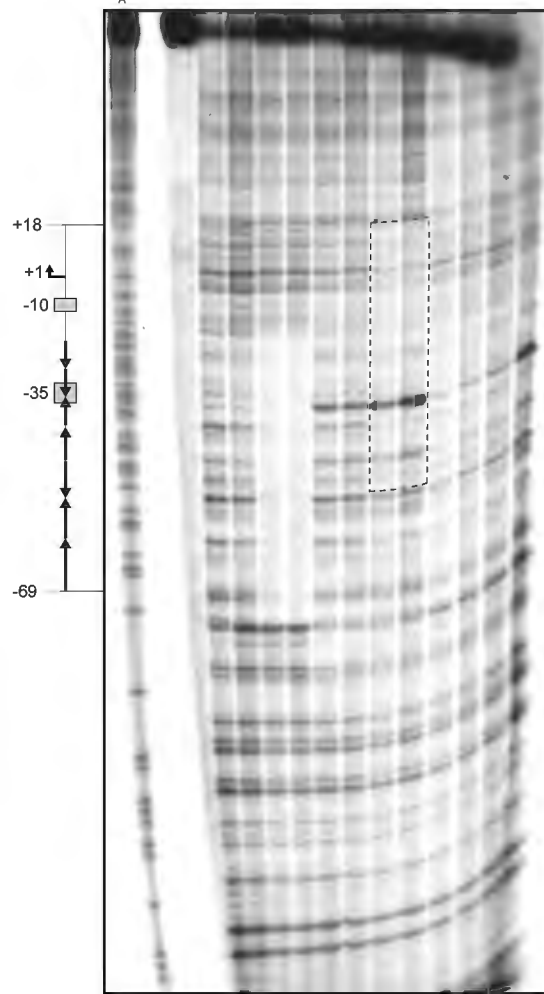

**B**

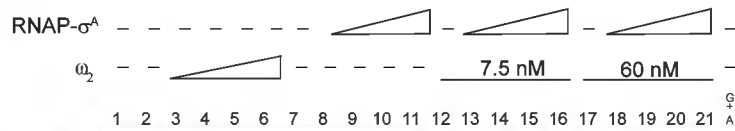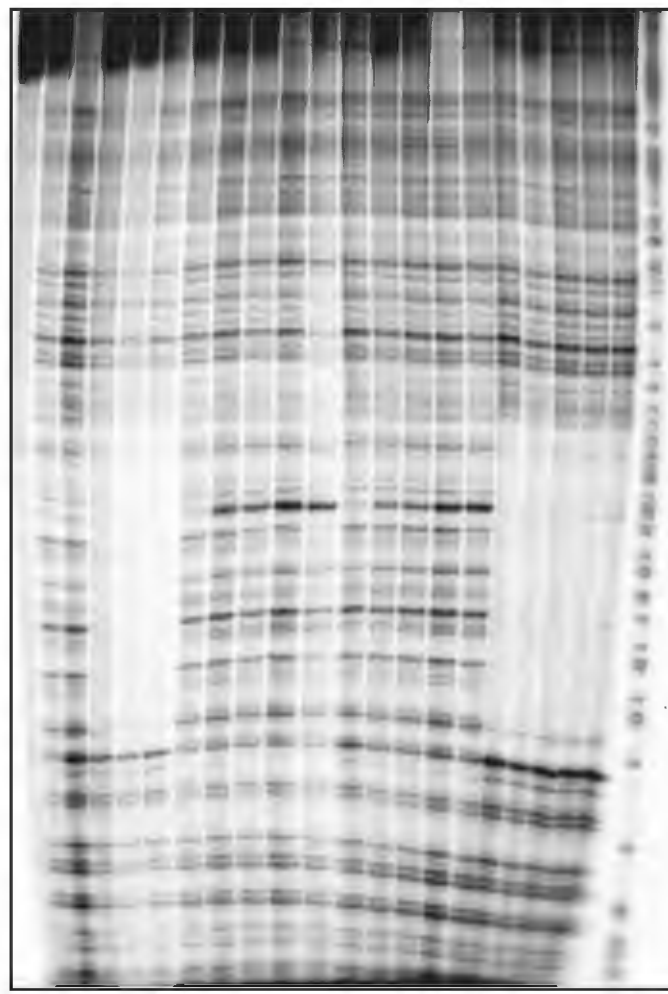

A

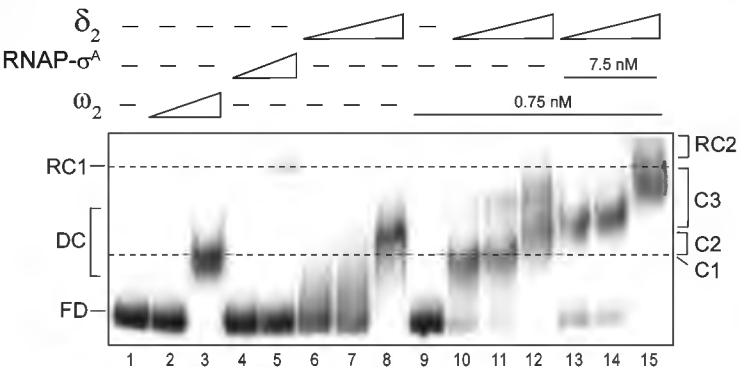

B

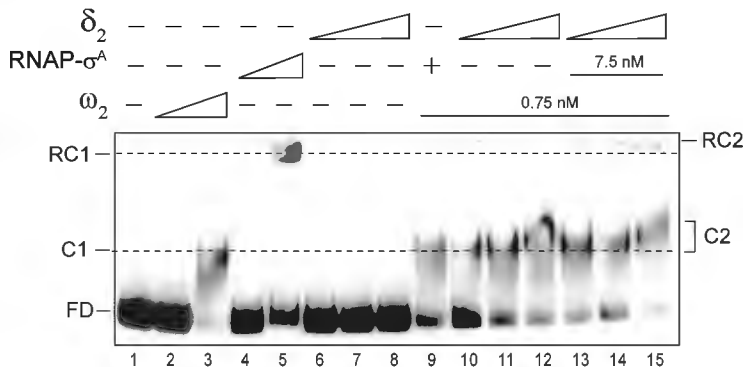

C

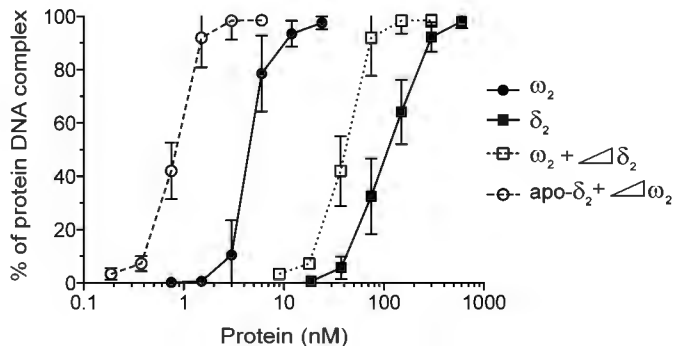

D

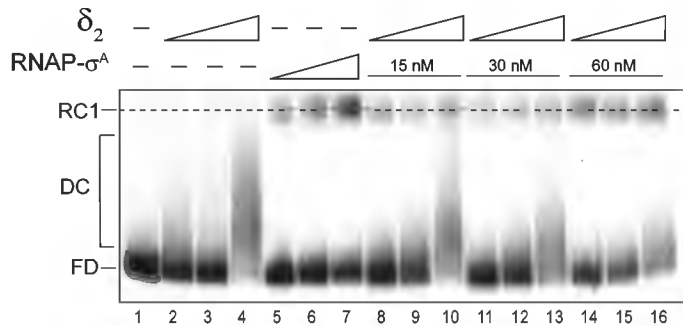

A

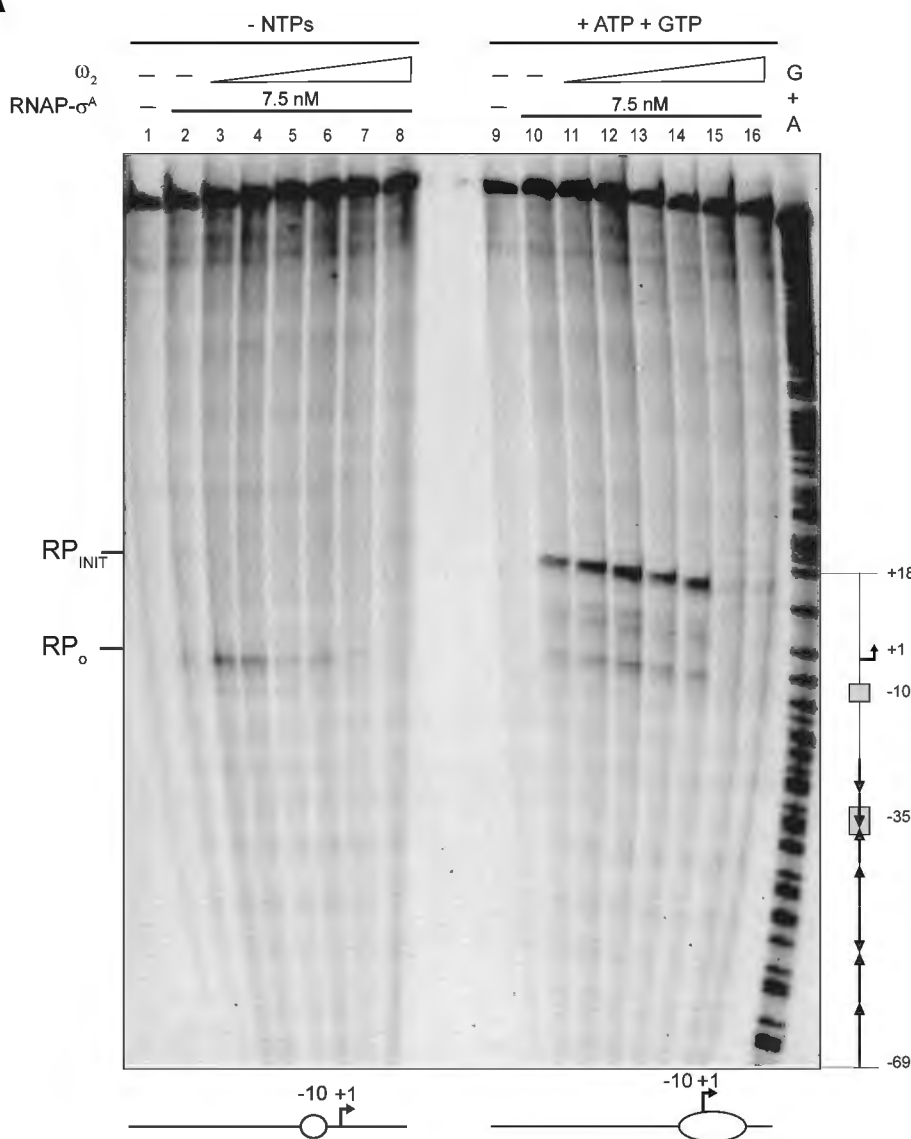

B

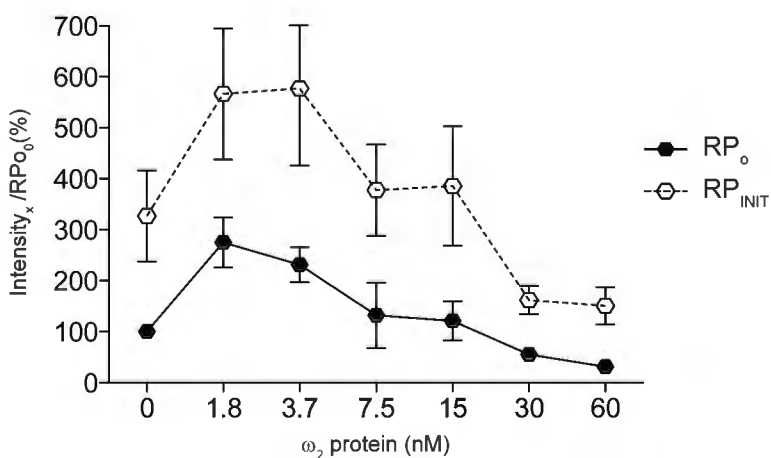

Fig. S5

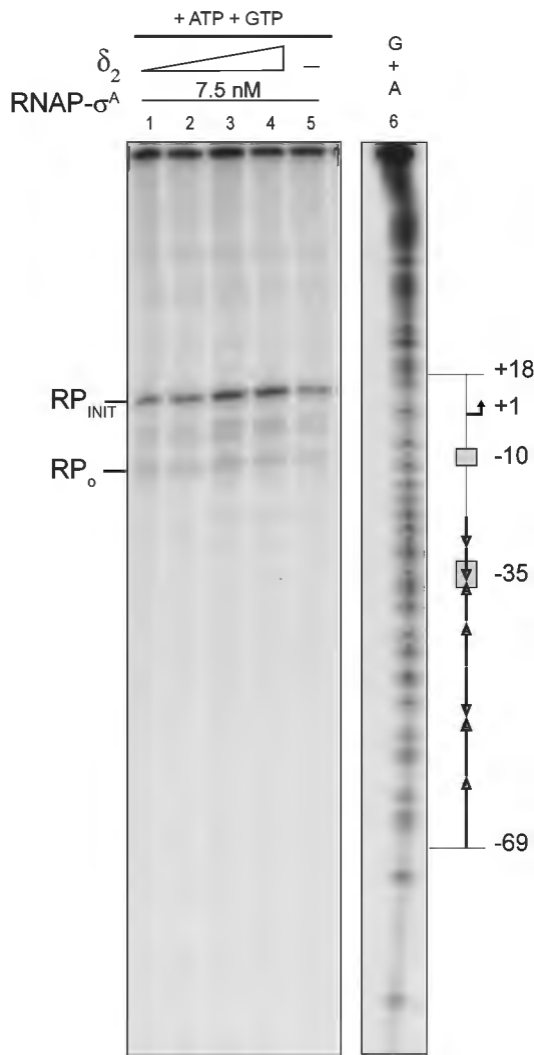

Fig. S6

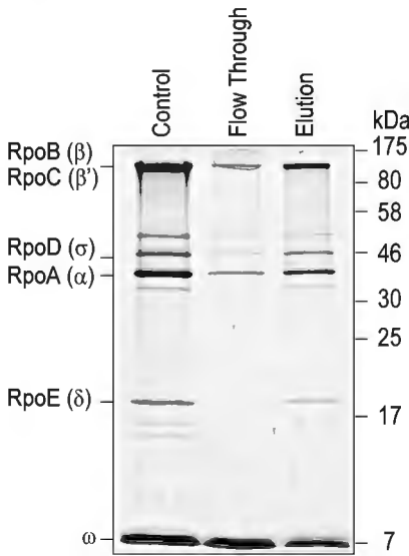



Fig. S8

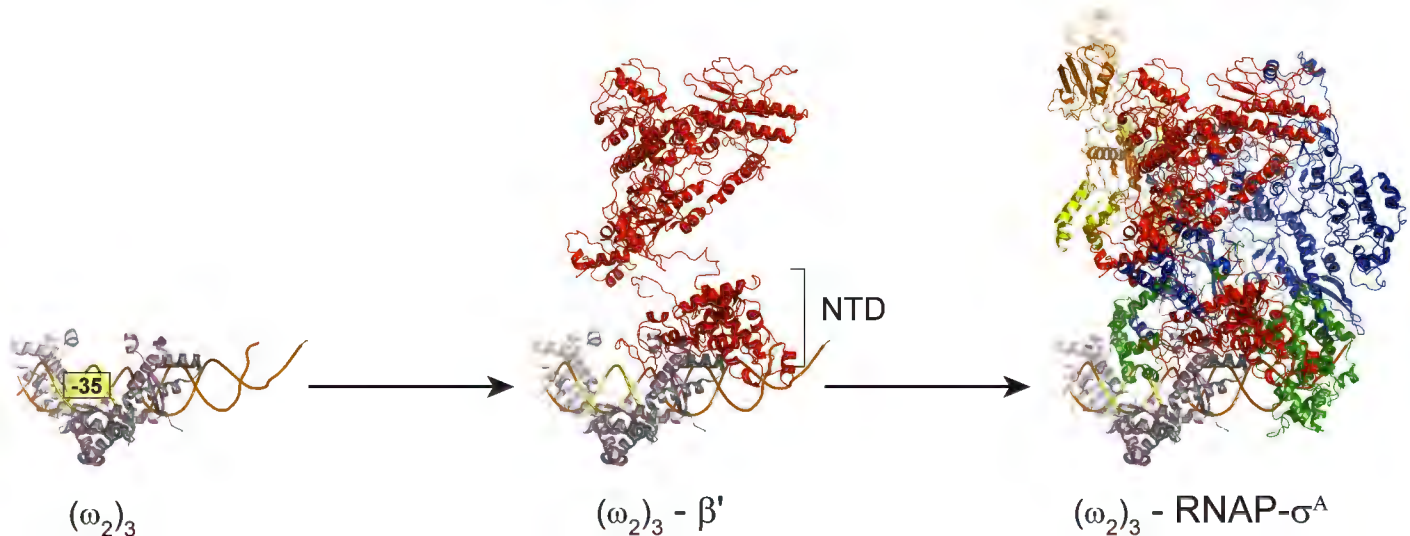

Supplement: supp_gkv788_nar-01342-v-2015-File007.pdf [file supp_gkv788_nar-01342-v-2015-File007.pdf]
